# Supplementary material
Source: publisher figshare collection journal article supplement (https://diabetesjournals.figshare.com/articles/dataset/_/21543030)
Supplement: Supplementary file 1 [file 38553356]

Different types of industry-produced and ruminant trans fatty acid intake and risk of type 2 diabetes: findings from the NutriNet-Santé prospective cohort

-  
*Supplemental Material*

**Supplemental Figure 1:** Flowchart for the selection of the study population, NutriNet-Santé cohort, 2009-2021

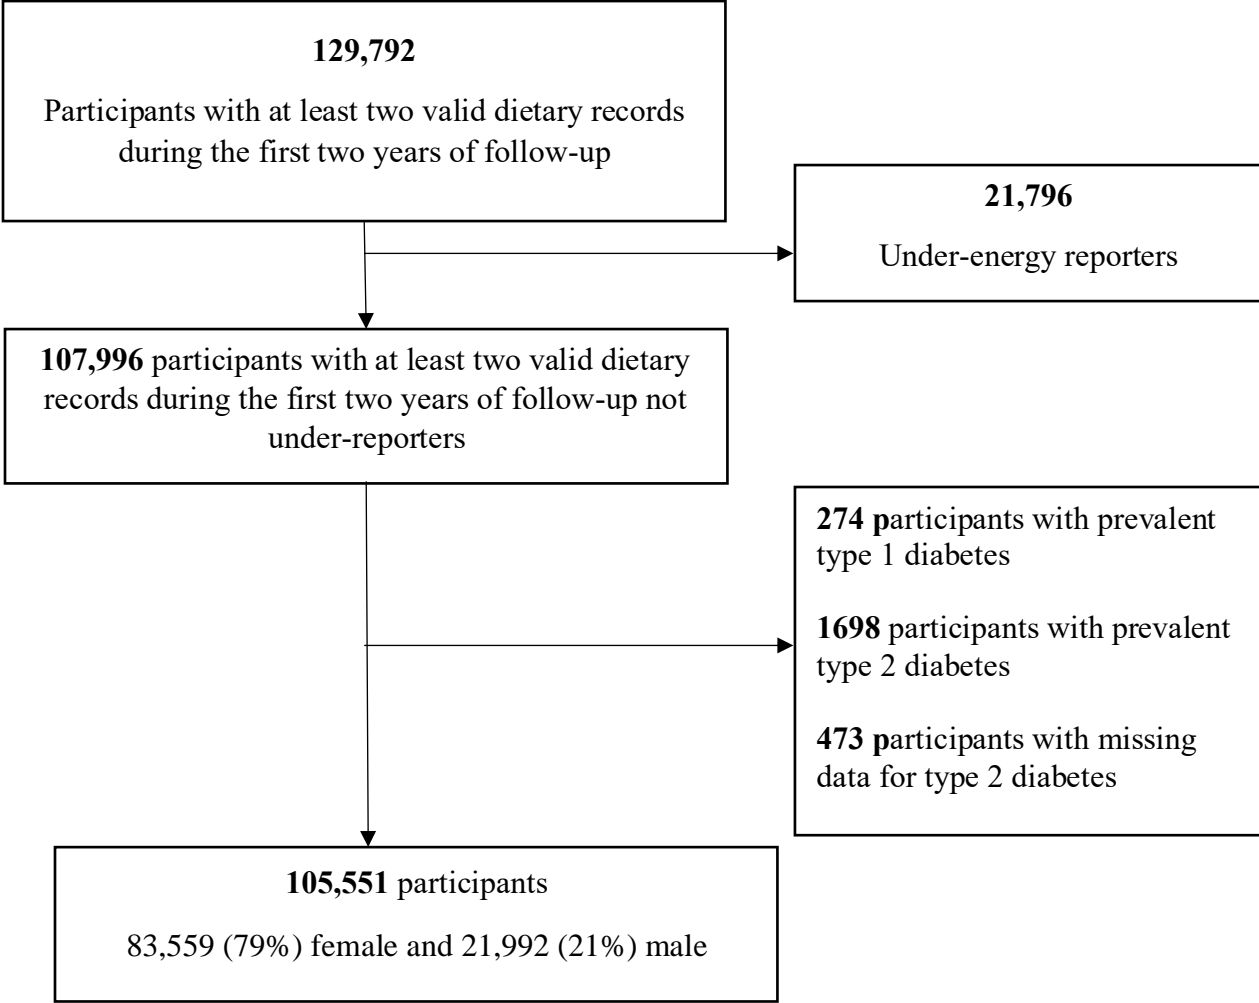

**Test of the proportional hazard assumption**

These Figures display Schoenfeld residuals to verify the proportional hazard assumption of the Cox models. Indeed, Cox proportional hazards model implies the verification of several assumptions. Thus, it is important to assess whether a fitted Cox regression model adequately describes the data. The proportional hazards assumption can be checked using statistical tests and graphical diagnostics based on the scaled Schoenfeld residuals. In principle, the Schoenfeld residuals are independent of time. A plot that shows a non-random pattern against time is evidence of violation of the proportional hazards assumption. From the graphical inspection in the figures 2 to 4, there is no pattern with time. The assumption of proportional hazards appears to be supported for total trans fatty acids (Supplemental figure 2-a), total industry-produced trans fatty acids (Supplemental figure 2-b) and total ruminant trans fatty acids (Supplemental figure 2-c).

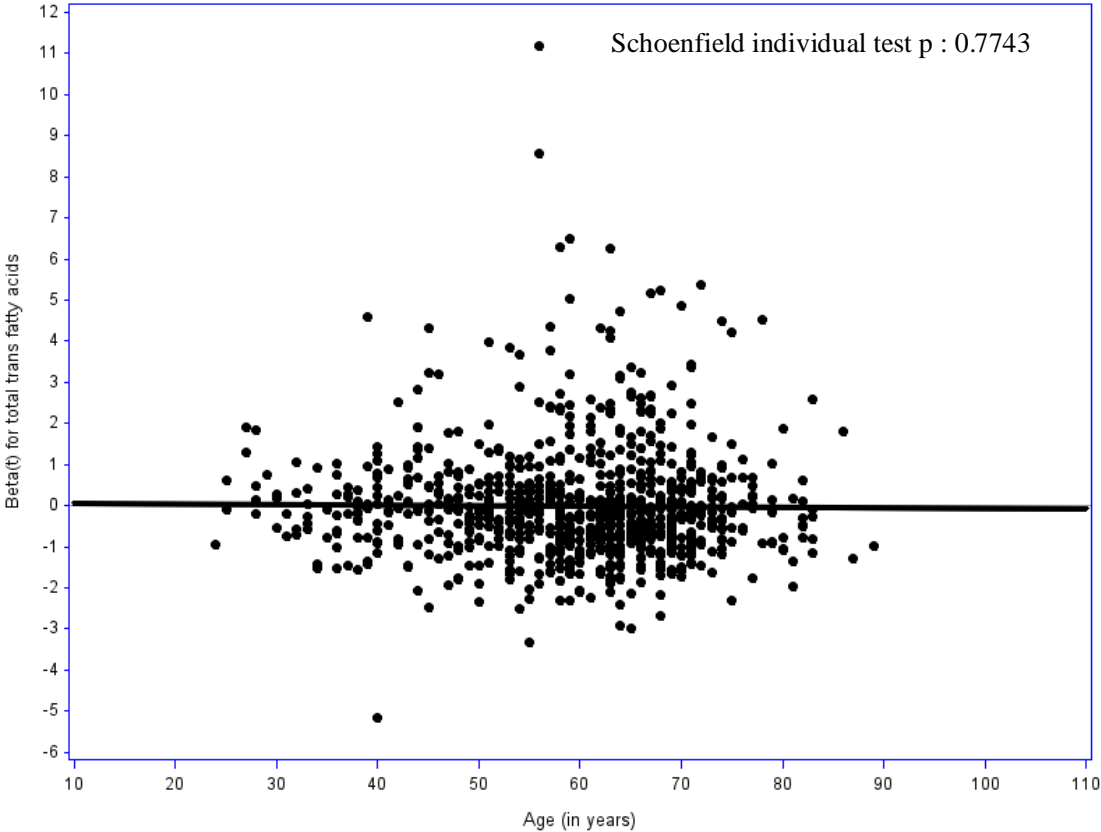

**Supplemental Figure 2-a:** Proportional hazard assumption testing using rescaled Schoenfeld-type residuals for total TFAs and type 2 diabetes risk

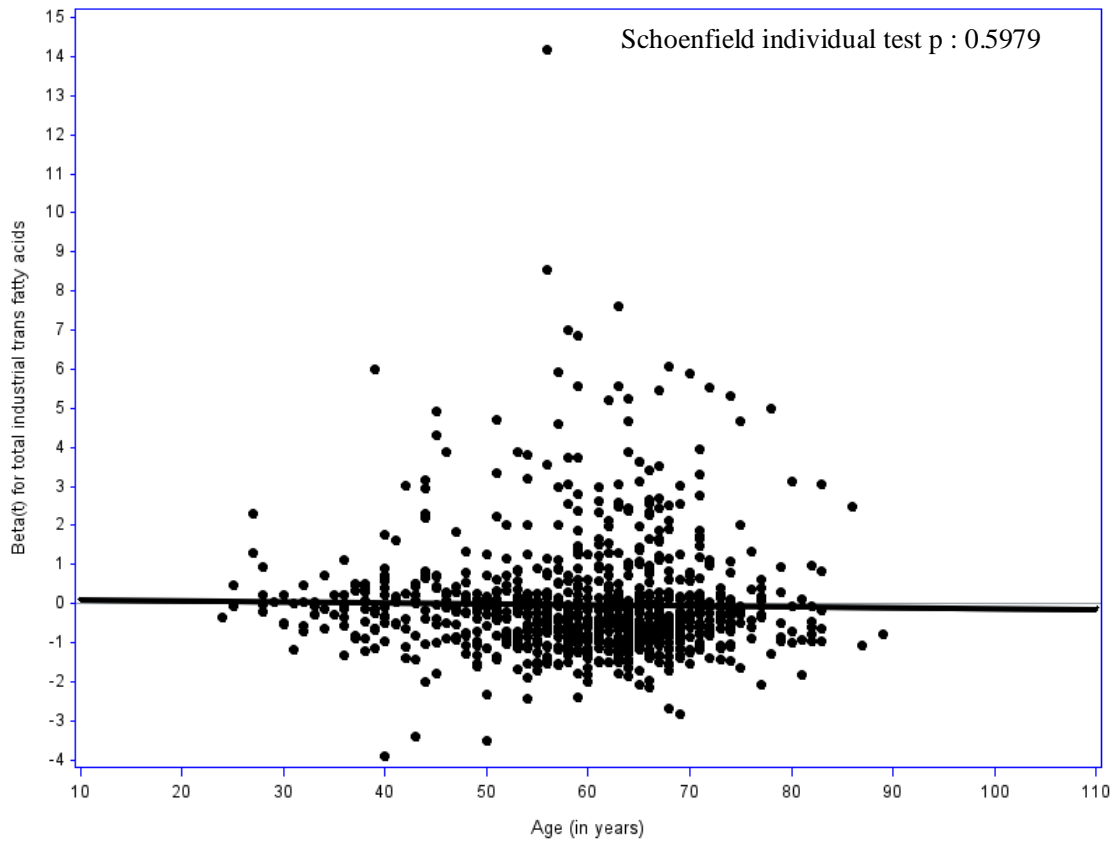

**Supplemental Figure 2-b:** Proportional hazard assumption testing using rescaled Schoenfeld-type residuals for industry-produced TFAs and type 2 diabetes risk

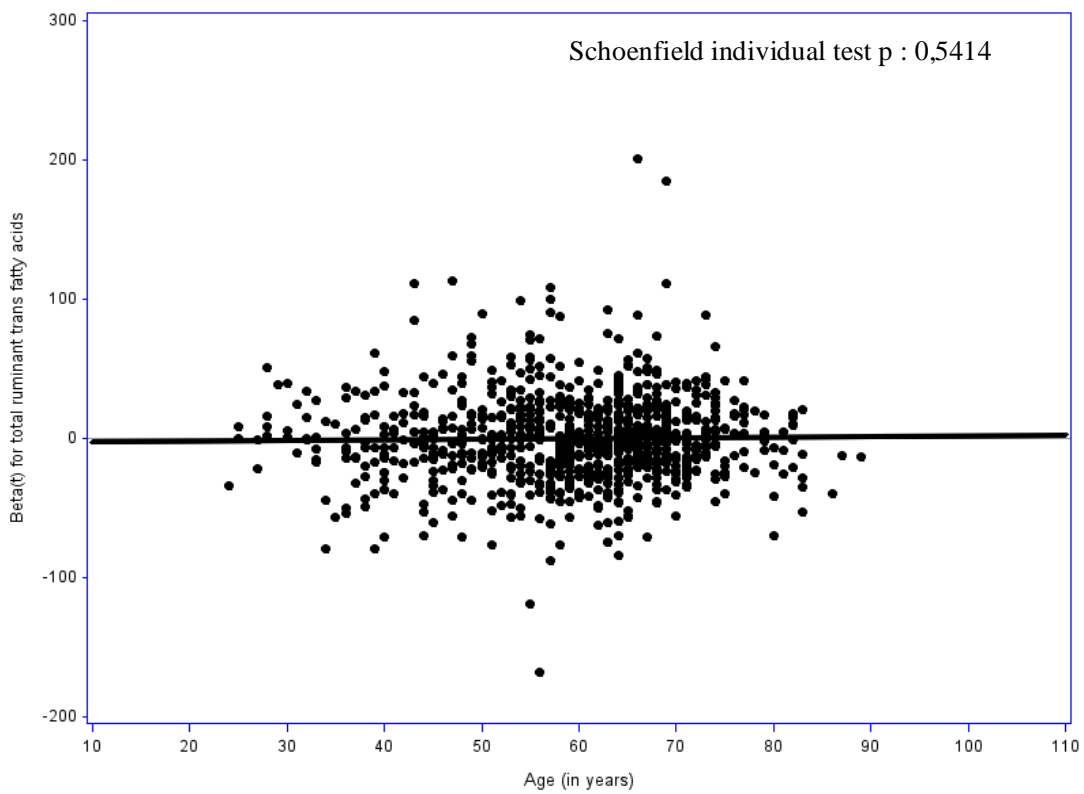

**Supplemental Figure 2-c:** Proportional hazard assumption testing using rescaled Schoenfeld-type residuals for ruminant TFAs and type 2 diabetes risk

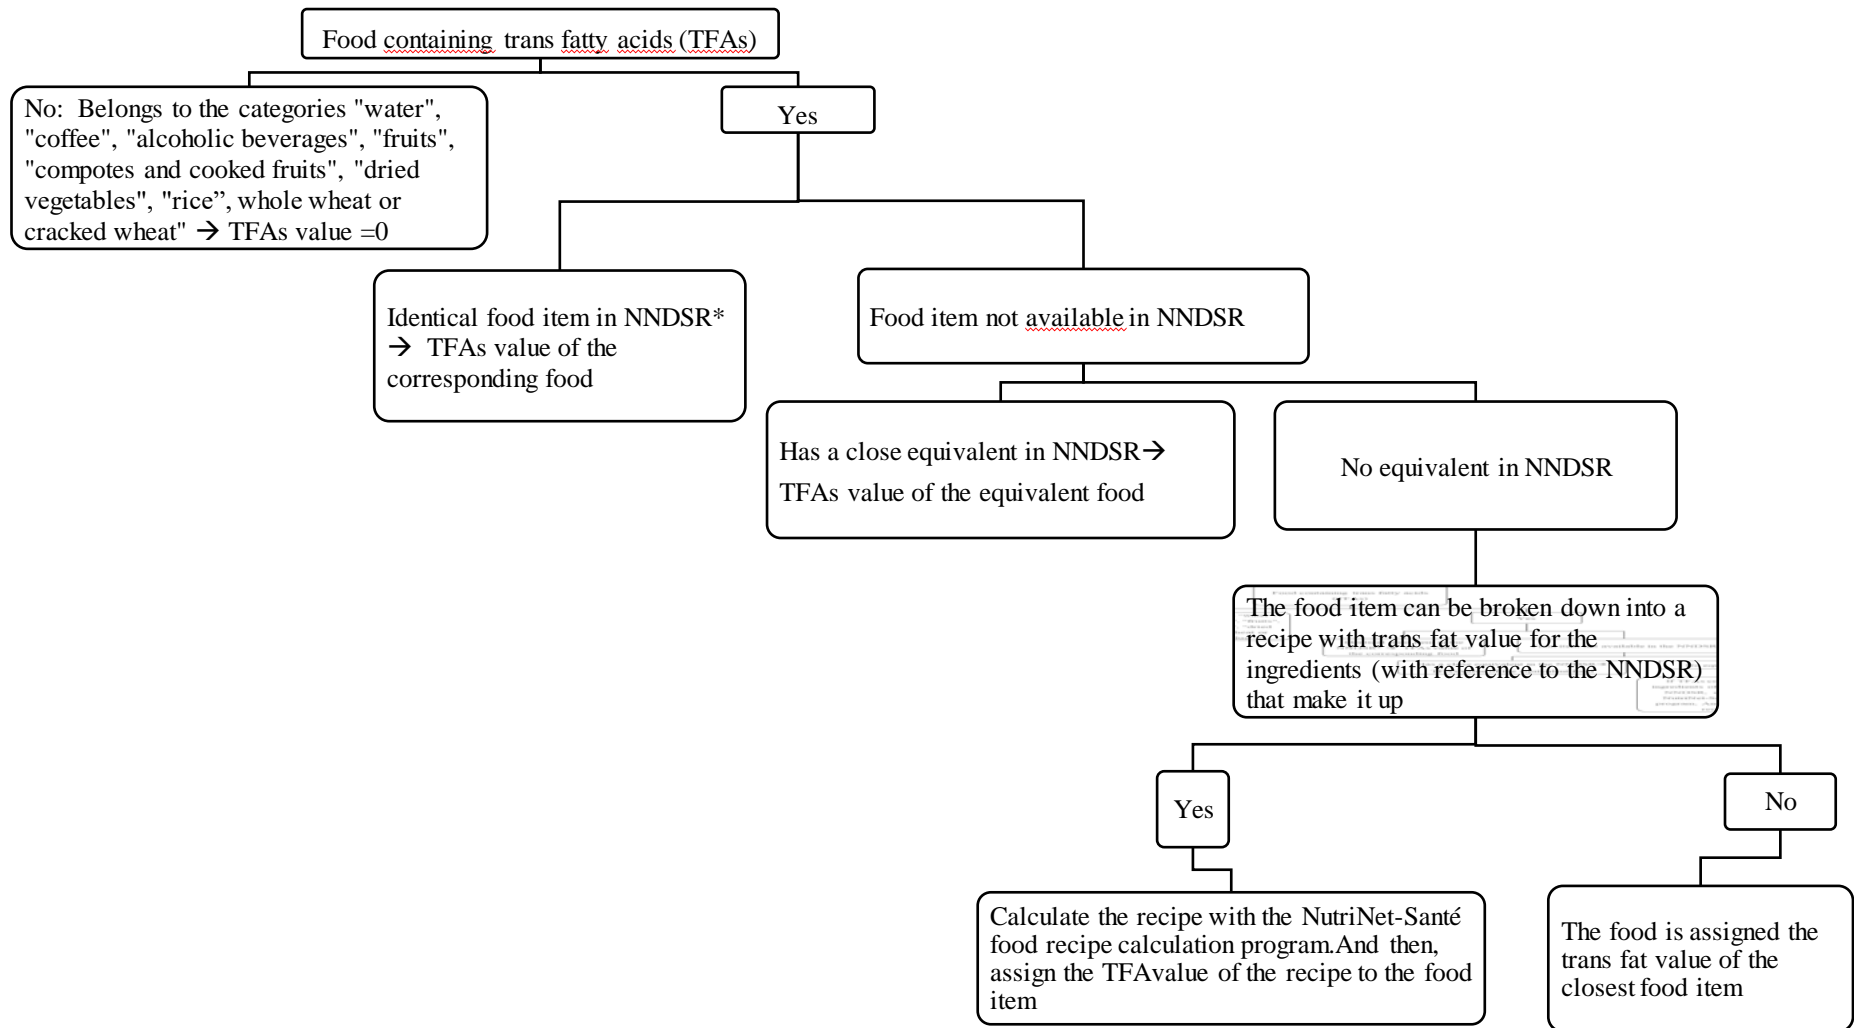

**Supplemental Figure 3:** Detailed decision tree for TFAs composition assignment with reference to the NNDSR (\*National Nutrient Database for Standard Reference of the United States). A TFA composition value was attributed to all food items that were likely to contain some. Indeed, when the exact match with the USDA composition table was not found for a particular food item, the value of the closest food/beverage equivalent was selected. For composite food dishes, the amount of TFAs was estimated using validated French recipes by summing TFA amounts contained in the different ingredients composing the dish.

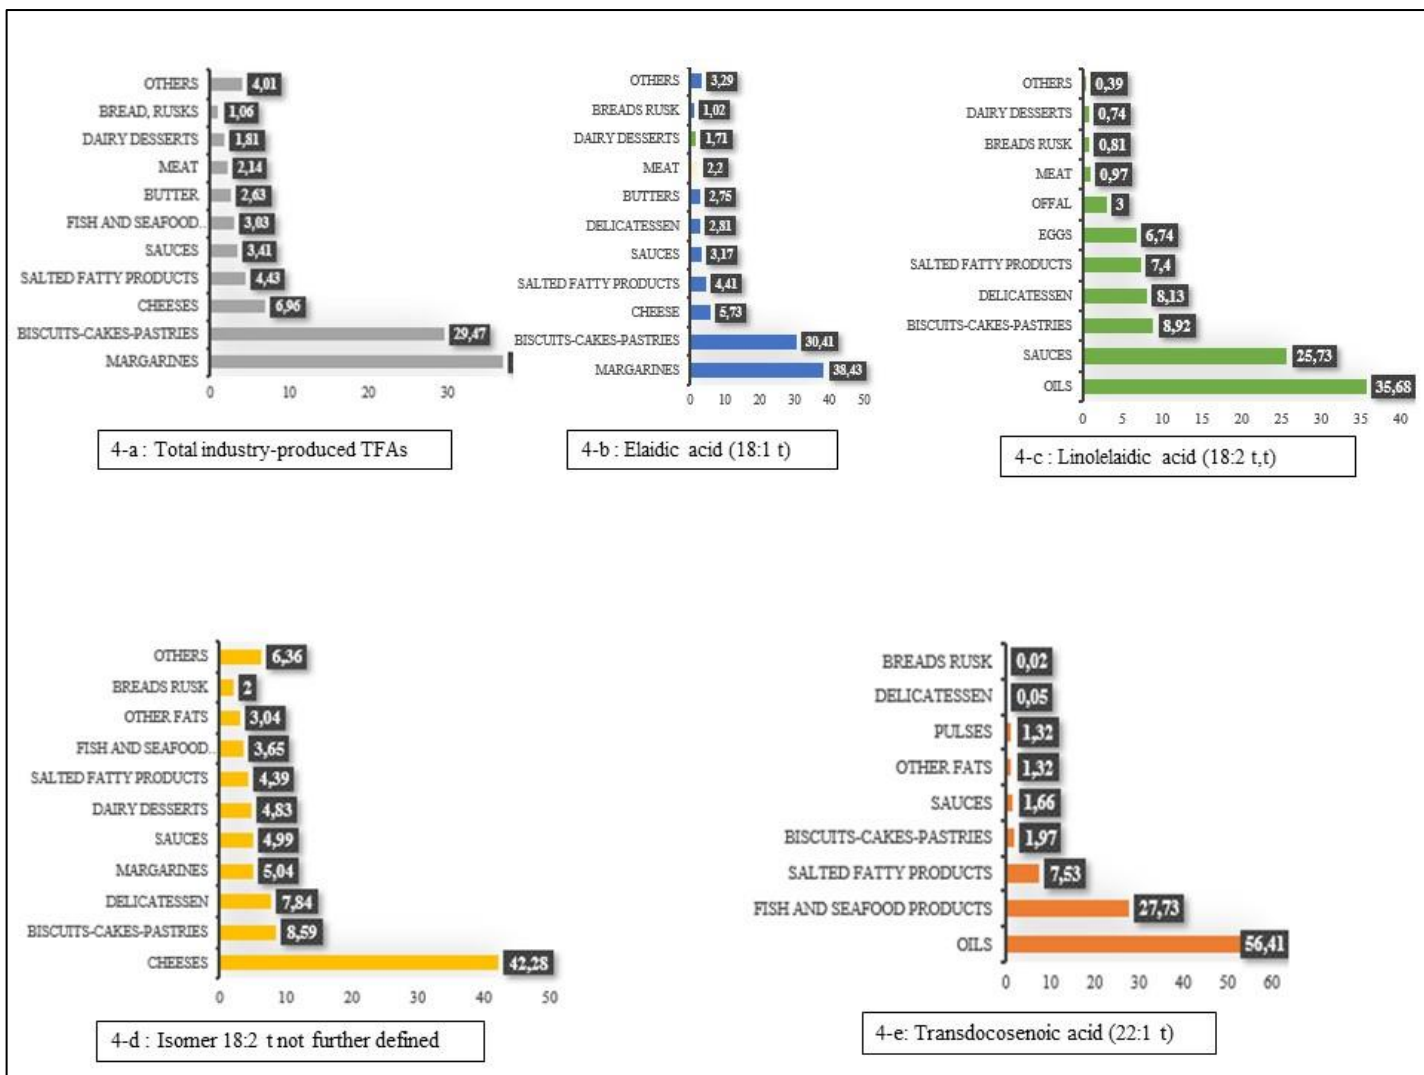

**Supplemental Figures 4-a, 4-b, 4-c, 4-d, 4-e:** Contribution (%) of food groups to intake of each type of industry-produced TFAs– NutriNet-Santé cohort, France, 2009-2021 (n=105,551)

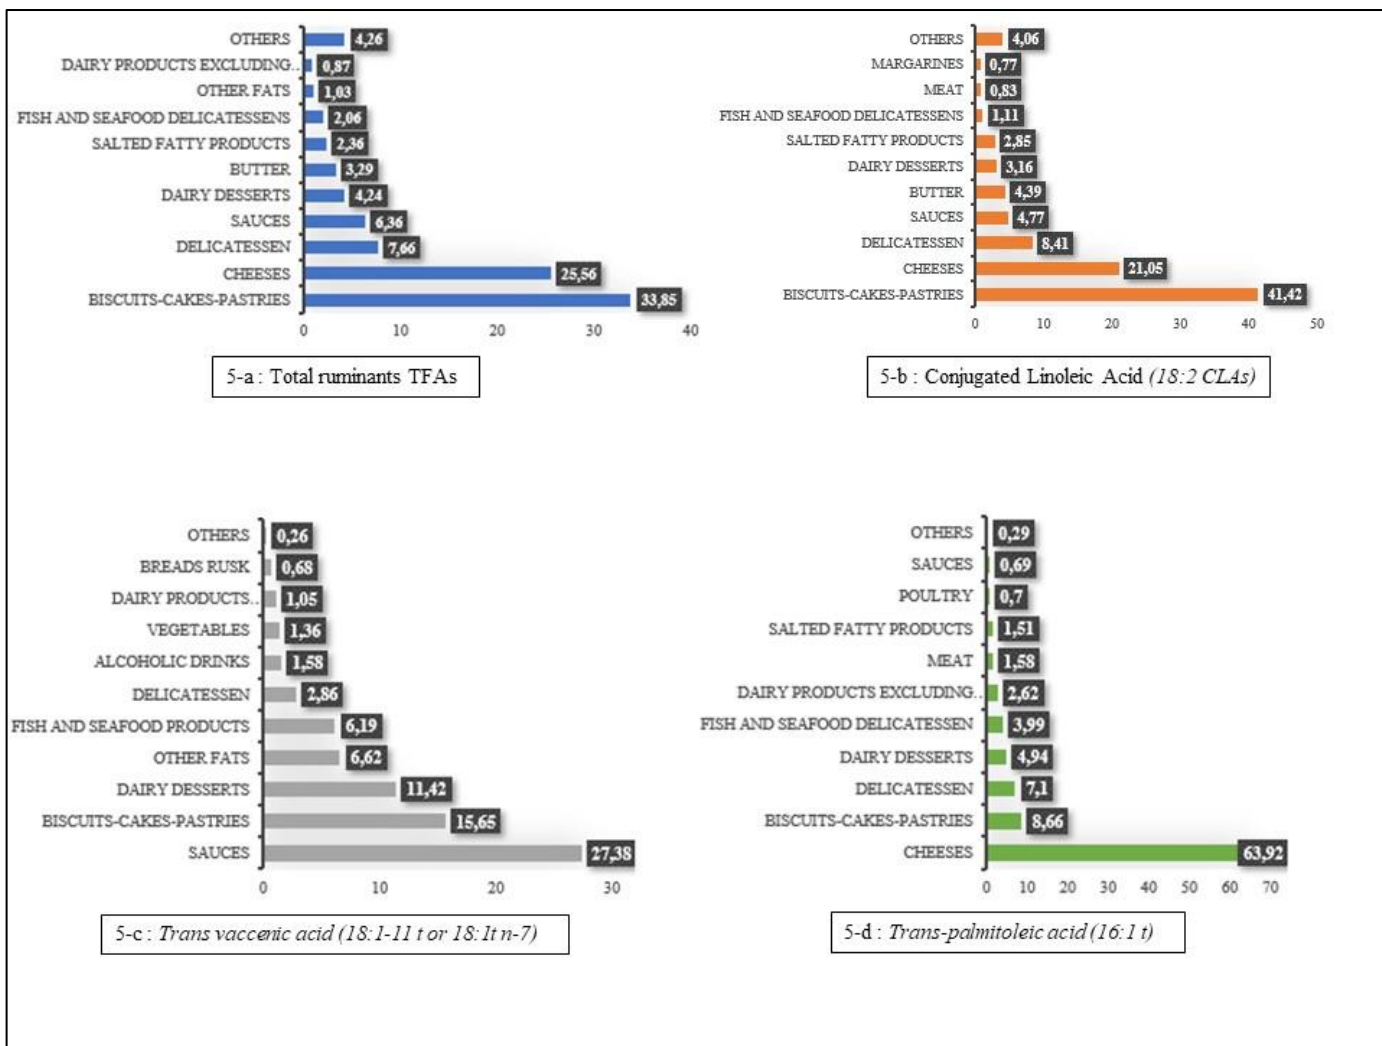

**Supplemental Figures 5a, 5-b, 5-c, 5-d:** Contribution (%) of food groups to intake of each type of TFA from ruminant sources – NutriNet-Santé cohort, France, 2009-2021 (n=105,551)

### **Supplemental Method 1: Type 2 diabetes case ascertainment (*International Statistical Classification of Diseases and Related Health Problems, Tenth Revision [ICD-10] code E11*)**

Participants were asked to declare major health events through the yearly health questionnaire, through a specific health check-up questionnaire every six months, or at any time through a specific interface on the study website. They were also asked to declare all currently taken medications and treatments via the check-up and yearly questionnaires. A search engine with embedded exhaustive Vidal® drug database is used to facilitate medication data entry for the participants. Besides, our research team was the first in France to obtain the authorization by Decree in the Council of State (n°2013-175) to link data from our general population-based cohorts to medico-administrative databases of the National health insurance (SNIIRAM database). Thus, data from the NutriNet-Santé cohort are linked every year to medico-administrative databases of the SNIIRAM, providing detailed information about the reimbursement of medication and medical consultations. Regarding type 2 diabetes specifically: all 969 cases were primarily detected through the declaration by the participants of a type 2 diabetes diagnosed by a physician and/or diabetes medication use, in follow-up questionnaires. The questions were: “Have you been diagnosed with type 2 diabetes (if yes, indicate the date of diagnosis)” and “Are you treated for type 2 diabetes?”. ATC codes considered for type 2 diabetes medication were A10AB01, A10AB03, A10AB04, A10AB05, A10AB06, A10AC01, A10AC03, A10AC04, A10AD01, A10AD03, A10AD04, A10AD05, A10AE01, A10AE02, A10AE03, A10AE04, A10AE05, A10AE30, A10BA02, A10BB01, A10BB03, A10BB04, A10BB06, A10BB07, A10BB09, A10BB12, A10BD02, A10BD03, A10BD05, A10BD07, A10BD08, A10BD10, A10BD15, A10BD16, A10BF01, A10BF02, A10BG02, A10BG03, A10BH01, A10BH02, A10BH03, A10BX02, A10BX04, A10BX07, A10BX09, A10BX10, A10BX11, A10BX12.

In addition to the diagnosis of type 2 diabetes and/or a medication report, two sources of confirmation were considered. First, linkage with the SNIIRAM database confirmed more than 80% of the cases surveyed (ICD-10 codes E11). Second, among participants who provided a blood sample at the clinical/biological examination, 85.3 % of those with elevated fasting blood glucose (i.e.,  $>1.26 \text{ g/L}^9$ ) had consistently reported a diagnosis of type 2 diabetes and/or medication. However, elevated blood glucose without any declaration of type 2 diabetes diagnosis or treatment was not considered specific enough to classify the participant as a type 2 diabetes case.

### **Supplemental Method 2: Multiple Imputation by Chained Equations**

Missing values for covariates were handled using the Multiple Imputation by Chained Equations (MICE) method<sup>2</sup> (20 imputed datasets) for the following covariates: smoking status (0.07% missing), level of education (0.86%), physical activity (13.81%), occupation (0.86%),



prevalence of dyslipidemia (0.44%), BMI (1.56%), family history of diabetes (1.39% missing), marital status (0.25% missing), prevalence of cardiovascular disease (0.44% missing).

### Supplemental Method 3: Method for deriving dietary patterns by Principal Component Analysis and corresponding factor loadings

Dietary patterns were produced from principal-components analysis based on 20 predefined food groups, using the SAS “Proc Factor” procedure. This factor analysis forms linear combinations of the original food groups, grouping together correlated variables. Coefficients defining these linear combinations are called factor loadings. A positive factor loading means that the food group is positively associated with the factor, whereas a negative loading reflects an inverse association with the factor. For interpreting the factor, foods with a coefficient under -0.25 or over 0.25 were considered. Factors were then rotated by orthogonal transformation using the SAS “Varimax” option to maximize the independence (orthogonality) of retained factors and obtain a simpler structure for easier interpretation. In determining the number of factors retain, eigenvalues greater than 1.25, the scree test (with values being retained at the break point between components with large eigenvalues and those with small eigenvalues on the scree plot), and the interpretability of the factors were considered. For each subject, a factor score for each pattern was computed by summing observed consumption from all food groups, weighted by the food group factor loadings. The factor score measures the conformity of an individual’s diet to the given pattern. Labeling was descriptive, based on foods most strongly associated with the dietary patterns. The ‘Healthy’ pattern (explaining 10.7% of the variance) was characterized by higher intakes of fruits, vegetables, soups and broths, unsweetened soft drinks and whole grains. The ‘Western’ pattern (explaining 7.7% of the variance) was characterized by higher intakes of fat and sauces, alcohol, meat and starchy foods. These patterns were introduced into the models to reflect the overall pattern of food consumption of the participants.

|                         | Factor loadings   |                   |
|-------------------------|-------------------|-------------------|
|                         | ‘Healthy’ Pattern | ‘Western’ Pattern |
| Alcoholic drinks        | -0.133277         | 0.353153          |
| Breakfast cereals       | 0.116896          | -0.243968         |
| Cakes and biscuits      | -0.286360         | -0.010026         |
| Dairy products          | 0.079645          | -0.012452         |
| Eggs                    | 0.117015          | 0.059990          |
| Fats and sauces         | 0.035011          | 0.667740          |
| Fish and seafood        | 0.292119          | 0.125929          |
| Fruit                   | 0.517207          | 0.046517          |
| Meat                    | -0.279305         | 0.404238          |
| Pasta and rice          | -0.299307         | 0.429694          |
| Potatoes and tubers     | -0.012724         | 0.500089          |
| Poultry                 | -0.055723         | 0.088790          |
| Processed meat          | -0.338193         | 0.270663          |
| Pulses                  | 0.303690          | 0.015773          |
| Soups and broths        | 0.390139          | 0.291322          |
| Sugar and confectionery | -0.120684         | 0.126217          |
| Sweetened soft drinks   | -0.423675         | -0.014394         |
| Unsweetened soft drinks | 0.375867          | 0.180510          |
| Vegetables              | 0.689052          | 0.276493          |
| Whole grains            | 0.561902          | -0.072701         |

**Supplemental Table 1:** Association between trans fatty acid intake and type 2 diabetes risk excluding cases occurring during the first two years of follow-up (to challenge the potential reverse causality bias), NutriNet-Santé cohort, France, 2009-2021 (n=105,551)

|                                                         |                               | Sex-specific quartiles |                  |                  |                  |         |
|---------------------------------------------------------|-------------------------------|------------------------|------------------|------------------|------------------|---------|
|                                                         |                               | 1                      | 2                | 3                | 4                | P-trend |
| <b>Total trans fatty acids</b>                          | Incident cases / Participants | 149 / 26,324           | 156 / 26,326     | 178 / 26,326     | 236 / 26,325     |         |
|                                                         | HR (95% CI)                   | 1                      | 0.91 (0.72-1.14) | 1.13 (0.89-1.43) | 1.38 (1.07-1.77) | 0.001   |
| <b>Trans fatty acids from industry-produced sources</b> | Incident cases / Participants | 150 / 26,324           | 154 / 26,326     | 179 / 26,326     | 236 / 26,325     |         |
|                                                         | HR (95% CI)                   | 1                      | 0.91 (0.72-1.14) | 1.16 (0.91-1.47) | 1.42 (1.10-1.85) | <0.001  |
| Elaidic acid (18:1 t)                                   | Incident cases / Participants | 151 / 26,324           | 156 / 26,326     | 178 / 26,326     | 234 / 26,325     |         |
|                                                         | HR (95% CI)                   | 1                      | 0.92 (0.73-1.15) | 1.10 (0.87-1.41) | 1.33 (1.03-1.72) | 0.005   |
| Linolelaidic acid (18:2 t,t)                            | Incident cases / Participants | 116 / 26,326           | 155 / 26,324     | 215 / 26,326     | 233 / 26,325     |         |
|                                                         | HR (95% CI)                   | 1                      | 1.12 (0.87-1.44) | 1.31 (1.03-1.67) | 1.37 (1.08-1.73) | 0.01    |
| Transdocosenoic acid (22:1 t)                           | Incident cases / Participants | 130 / 28,599           | 188 / 25,582     | 181 / 25,582     | 220 / 25,538     |         |
|                                                         | HR (95% CI)                   | 1                      | 1.14 (0.90-1.45) | 1.03 (0.81-1.31) | 1.07 (0.85-1.35) | 0.9     |
| Isomer 18:2 t not further defined                       | Incident cases / Participants | 129 / 26,324           | 170 / 26,326     | 207 / 26,326     | 213 / 26,325     |         |
|                                                         | HR (95% CI)                   | 1                      | 1.11 (0.88-1.40) | 1.35 (1.07-1.70) | 1.37 (1.07-1.75) | 0.007   |
| <b>Trans fatty acids from ruminant sources</b>          | Incident cases / Participants | 146 / 26,324           | 190 / 26,326     | 188 / 26,326     | 195 / 26,325     |         |
|                                                         | HR (95% CI)                   | 1                      | 1.03 (0.82-1.29) | 1.09 (0.85-1.38) | 1.16 (0.87-1.56) | 0.3     |
| Conjugated linoleic acid (18:2 CLAs)                    | Incident cases / Participants | 154 / 26,324           | 195 / 26,326     | 188 / 26,326     | 182 / 26,325     |         |
|                                                         | HR (95% CI)                   | 1                      | 1.05 (0.84-1.31) | 1.06 (0.83-1.35) | 1.01 (0.74-1.37) | 0.9     |
| Trans vaccenic acid (18:1-11 t or 18:1t n-7)            | Incident cases / Participants | 126 / 26,325           | 192 / 26,325     | 205 / 26,326     | 196 / 26,325     |         |
|                                                         | HR (95% CI)                   | 1                      | 1.17 (0.92-1.49) | 1.21 (0.95-1.53) | 1.20 (0.94-1.54) | 0.3     |
| Trans-palmitoleic acid (16:1 t)                         | Incident cases / Participants | 150 / 26,324           | 181 / 26,326     | 186 / 26,326     | 202 / 26,325     |         |
|                                                         | HR (95% CI)                   | 1                      | 1.01 (0.81-1.25) | 0.94 (0.75-1.18) | 1.15 (0.92-1.44) | 0.2     |

HR: Cause-specific hazard ratios, CI: Confidence Interval. Multivariable Cox proportional hazard model were adjusted for (=main model) age (time scale), sex, body mass index (continuous, kg/m<sup>2</sup>), physical activity (categorical IPAQ variable: high, moderate, low), smoking status (categorical: never, former, current smokers), educational level (categorical: less than high school degree, less than two years after high school degree, two and more years after high school degree), number of 24-hour dietary records (continuous), family history of type 2 diabetes (categorical: yes, no), prevalence of cardiovascular disease (categorical: yes, no), prevalence of dislipidemia (categorical: yes, no), marital status (categorical: married, in a relationship, divorced, widowed, single), baseline intakes of energy without alcohol (continuous, kcal/d), alcohol (continuous, g/d), sodium (continuous, g/d), saturated fatty acids (continuous, g/d), sugar (continuous, g/d), whole-grain foods (continuous, g/d), red and processed meat (continuous, g/d), fruits and vegetables (continuous, g/d).

**Supplemental Table 2:** Association between trans fatty acid intake and type 2 diabetes further adjusting for dietary patterns (“Healthy” and “Western”) instead of fruit, vegetable and meat intakes, NutriNet-Santé cohort, France, 2009-2021 (n=105,551)

|                                                         |                               | Sex-specific quartiles |                  |                  |                  | P-trend |
|---------------------------------------------------------|-------------------------------|------------------------|------------------|------------------|------------------|---------|
|                                                         |                               | 1                      | 2                | 3                | 4                |         |
| <b>Total trans fatty acids</b>                          | Incident cases / Participants | 199 / 26,359           | 221 / 26,403     | 242 / 26,402     | 307 / 26,387     |         |
|                                                         | HR (95% CI)                   | 1                      | 0.94 (0.77-1.15) | 1.09 (0.88-1.35) | 1.29 (1.02-1.62) | 0.005   |
| <b>Trans fatty acids from industry-produced sources</b> | Incident cases / Participants | 199 / 26,364           | 218 / 26,401     | 245 / 26,399     | 307 / 26,387     |         |
|                                                         | HR (95% CI)                   | 1                      | 0.96 (0.78-1.17) | 1.15 (0.93-1.43) | 1.37 (1.08-1.73) | 0.001   |
| Elaidic acid (18:1 t)                                   | Incident cases / Participants | 202 / 26,367           | 219 / 26,397     | 242 / 26,399     | 306 / 26,388     |         |
|                                                         | HR (95% CI)                   | 1                      | 0.94 (0.77-1.15) | 1.09 (0.88-1.35) | 1.27 (1.01-1.60) | 0.008   |
| Linolelaidic acid (18:2 t,t)                            | Incident cases / Participants | 157 / 26,344           | 221 / 26,404     | 295 / 26,417     | 296 / 26,386     |         |
|                                                         | HR (95% CI)                   | 1                      | 1.18 (0.95-1.46) | 1.39 (1.13-1.71) | 1.34 (1.08-1.64) | 0.02    |
| Transdocosenoic acid (22:1 t)                           | Incident cases / Participants | 185 / 28,654           | 254 / 25,596     | 237 / 25,687     | 293 / 25,614     |         |
|                                                         | HR (95% CI)                   | 1                      | 1.09 (0.88-1.33) | 0.96 (0.78-1.18) | 1.00 (0.81-1.22) | 0.7     |
| Isomer 18:2 t not further defined                       | Incident cases / Participants | 179 / 26,362           | 230 / 26,397     | 274 / 26,416     | 286 / 26,376     |         |
|                                                         | HR (95% CI)                   | 1                      | 1.06 (0.87-1.30) | 1.28 (1.05-1.57) | 1.32 (1.07-1.63) | 0.005   |
| <b>Trans fatty acids from ruminant sources</b>          | Incident cases / Participants | 195 / 26,364           | 256 / 26,394     | 256 / 26,409     | 262 / 26,384     |         |
|                                                         | HR (95% CI)                   | 1                      | 1.05 (0.86-1.28) | 1.09 (0.88-1.35) | 1.21 (0.93-1.56) | 0.1     |
| Conjugated linoleic acid (18:2 CLAs)                    | Incident cases / Participants | 205 / 26,363           | 260 / 26,399     | 260 / 26,410     | 244 / 26,379     |         |
|                                                         | HR (95% CI)                   | 1                      | 1.06 (0.87-1.29) | 1.09 (0.88-1.36) | 1.04 (0.79-1.36) | 0.8     |
| Trans vaccenic acid (18:1-11 t or 18:1t n-7)            | Incident cases / Participants | 174 / 26,321           | 256 / 26,416     | 278 / 26,432     | 261 / 26,382     |         |
|                                                         | HR (95% CI)                   | 1                      | 1.11 (0.90-1.36) | 1.13 (0.91-1.39) | 1.11 (0.89-1.38) | 0.5     |
| Trans-palmitoleic acid (16:1 t)                         | Incident cases / Participants | 195 / 26,374           | 232 / 26,393     | 267 / 26,408     | 275 / 26,376     |         |
|                                                         | HR (95% CI)                   | 1                      | 1.01 (0.83-1.23) | 1.07 (0.88-1.30) | 1.27 (1.05-1.55) | 0.006   |

HR: Cause-specific hazard ratios, CI: Confidence Interval. Multivariable Cox proportional hazard model were adjusted for (=main model) age (time scale), sex, body mass index (continuous, kg/m<sup>2</sup>), physical activity (categorical IPAQ variable: high, moderate, low), smoking status (categorical: never, former, current smokers), educational level (categorical: less than high school degree, less than two years after high school degree, two and more years after high school degree), number of 24-hour dietary records (continuous), family history of type 2 diabetes (categorical: yes, no), prevalence of cardiovascular disease (categorical: yes, no), prevalence of dislipidemia (categorical: yes, no), marital status (categorical: married, in a relationship, divorced, widowed, single), baseline intakes of energy without alcohol (continuous, kcal/d), alcohol (continuous, g/d), sodium (continuous, g/d), saturated fatty acids (continuous, g/d), sugar (continuous, g/d), whole-grain foods (continuous, g/d), red and processed meat (continuous, g/d), fruits and vegetables (continuous, g/d).

**Supplemental Table 3:** Association between trans fatty acid intake and type 2 diabetes risk restricting the study population to participants with at least four 24h-dietary records during the first two years, NutriNet-Santé cohort, France, 2009-2021 (n=105,551)

|                                                         |                               | Sex-specific quartiles |                   |                   |                   | P-trend |
|---------------------------------------------------------|-------------------------------|------------------------|-------------------|-------------------|-------------------|---------|
|                                                         |                               | 1                      | 2                 | 3                 | 4                 |         |
| <b>Total trans fatty acids</b>                          | Incident cases / Participants | 172 / 15,058           | 178 / 15,058      | 193 / 15,058      | 240 / 15,059      |         |
|                                                         | HR (95% CI)                   | 1                      | 1.06 (0.85-1.33)  | 1.09 (0.86-1.37)  | 1.36 (1.06-1.73)  | 0.008   |
| <b>Trans fatty acids from industry-produced sources</b> | Incident cases / Participants | 175 / 15,058           | 173 / 15,058      | 194 / 15,058      | 241 / 15,059      |         |
|                                                         | HR (95% CI)                   | 1                      | 1.00 (0.80- 1.26) | 1.08 (0.85- 1.36) | 1.28 (1.00- 1.65) | 0.03    |
| Elaidic acid (18:1 t)                                   | Incident cases / Participants | 175 / 15,057           | 180 / 15,059      | 188 / 15,058      | 240 / 15,059      |         |
|                                                         | HR (95% CI)                   | 1                      | 1.04 (0.84- 1.30) | 1.03 (0.82- 1.30) | 1.25 (0.97- 1.59) | 0.06    |
| Linolelaidic acid (18:2 t,t)                            | Incident cases / Participants | 154 / 15,059           | 175 / 15,058      | 215 / 15,057      | 239 / 15,059      |         |
|                                                         | HR (95% CI)                   | 1                      | 1.15 (0.92-1.45)  | 1.38 (1.11-1.71)  | 1.26 (1.02-1.57)  | 0.1     |
| Transdocosenoic acid (22:1 t)                           | Incident cases / Participants | 101 / 8,534            | 226 / 17,233      | 202 / 17,234      | 254 / 17,232      |         |
|                                                         | HR (95% CI)                   | 1                      | 1.14 (0.89-1.47)  | 1.00 (0.77-1.29)  | 1.13 (0.88-1.45)  | 0.5     |
| Isomer 18:2 t not further defined                       | Incident cases / Participants | 154 / 15,057           | 169 / 15,059      | 221 / 15,059      | 239 / 15,058      |         |
|                                                         | HR (95% CI)                   | 1                      | 0.94 (0.75-1.18)  | 1.31 (1.05-1.63)  | 1.37 (1.09-1.72)  | <0.001  |
| <b>Trans fatty acids from ruminant sources</b>          | Incident cases / Participants | 179 / 15,058           | 197 / 15,059      | 196 / 15,057      | 211 / 15,059      |         |
|                                                         | HR (95% CI)                   | 1                      | 1.20 (0.96-1.50)  | 1.30 (1.03-1.65)  | 1.39 (1.05-1.83)  | 0.02    |
| Conjugated linoleic acid (18:2 CLAs)                    | Incident cases / Participants | 180 / 15,058           | 209 / 15,058      | 198 / 15,059      | 196 / 15,058      |         |
|                                                         | HR (95% CI)                   | 1                      | 1.30 (1.04-1.61)  | 1.28 (1.01-1.62)  | 1.25 (0.93-1.67)  | 0.2     |
| Trans vaccenic acid (18:1-11 t or 18:1t n-7)            | Incident cases / Participants | 184 / 15,072           | 189 / 15,044      | 199 / 15,060      | 211 / 15,057      |         |
|                                                         | HR (95% CI)                   | 1                      | 1.03 (0.83-1.27)  | 0.98 (0.79-1.21)  | 1.09 (0.87-1.36)  | 0.5     |
| Trans-palmitoleic acid (16:1 t)                         | Incident cases / Participants | 160 / 15,057           | 187 / 15,059      | 208 / 15,059      | 228 / 15,058      |         |
|                                                         | HR (95% CI)                   | 1                      | 1.20 (0.96-1.48)  | 1.18 (0.95-1.47)  | 1.37 (1.10-1.70)  | 0.007   |

HR: Cause-specific hazard ratios, CI: Confidence Interval. Multivariable Cox proportional hazard model were adjusted for (=main model) age (time scale), sex, body mass index (continuous, kg/m<sup>2</sup>), physical activity (categorical IPAQ variable: high, moderate, low), smoking status (categorical: never, former, current smokers), educational level (categorical: less than high school degree, less than two years after high school degree, two and more years after high school degree), number of 24-hour dietary records (continuous), family history of type 2 diabetes (categorical: yes, no), prevalence of cardiovascular disease (categorical: yes, no), prevalence of dislipidemia (categorical: yes, no), marital status (categorical: married, in a relationship, divorced, widowed, single), baseline intakes of energy without alcohol (continuous, kcal/d), alcohol (continuous, g/d), sodium (continuous, g/d), saturated fatty acids (continuous, g/d), sugar (continuous, g/d), whole-grain foods (continuous, g/d), red and processed meat (continuous, g/d), fruits and vegetables (continuous, g/d).

**Supplemental Table 4:** Association between trans fatty acid intake and type 2 diabetes, excluding incident cases of type 1 diabetes from the study population NutriNet-Santé cohort, France, 2009-2021 (n=105,551)

|                                                         |                               | Sex-specific quartiles |                  |                  |                  | P-trend |
|---------------------------------------------------------|-------------------------------|------------------------|------------------|------------------|------------------|---------|
|                                                         |                               | 1                      | 2                | 3                | 4                |         |
| <b>Total trans fatty acids</b>                          | Incident cases / Participants | 199 / 26,365           | 221 / 26,365     | 242 / 26,367     | 307 / 26,366     |         |
|                                                         | HR (95% CI)                   | 1                      | 0.96 (0.78-1.17) | 1.14 (0.93-1.41) | 1.38 (1.11-1.73) | <0.001  |
| <b>Trans fatty acids from industry-produced sources</b> | Incident cases / Participants | 199 / 26,365           | 218 / 26,365     | 245 / 26,367     | 307 / 26,366     |         |
|                                                         | HR (95% CI)                   | 1                      | 0.97 (0.79-1.19) | 1.20 (0.97-1.49) | 1.45 (1.16-1.83) | <0.001  |
| Elaidic acid (18:1 t)                                   | Incident cases / Participants | 203 / 26,365           | 218 / 26,365     | 242 / 26,367     | 306 / 26,366     |         |
|                                                         | HR (95% CI)                   | 1                      | 0.95 (0.77-1.16) | 1.14 (0.92-1.41) | 1.36 (1.08-1.70) | 0.001   |
| Linolelaidic acid (18:2 t,t)                            | Incident cases / Participants | 157 / 26,362           | 221 / 26,369     | 295 / 26,367     | 296 / 26,365     |         |
|                                                         | HR (95% CI)                   | 1                      | 1.18 (0.95-1.47) | 1.37 (1.12-1.69) | 1.29 (1.05-1.59) | 0.07    |
| Transdocosenoic acid (22:1 t)                           | Incident cases / Participants | 185 / 28,636           | 254 / 25,619     | 238 / 25,620     | 292 / 25,588     |         |
|                                                         | HR (95% CI)                   | 1                      | 1.08 (0.88-1.32) | 0.97 (0.79-1.20) | 1.00 (0.82-1.22) | 0.8     |
| Isomer 18:2 t not further defined                       | Incident cases / Participants | 179 / 26,364           | 230 / 26,367     | 274 / 26,368     | 286 / 26,364     |         |
|                                                         | HR (95% CI)                   | 1                      | 1.07 (0.87-1.31) | 1.28 (1.05-1.57) | 1.31 (1.06-1.62) | 0.007   |
| <b>Trans fatty acids from ruminant sources</b>          | Incident cases / Participants | 195 / 26,365           | 256 / 26,367     | 256 / 26,366     | 262 / 26,365     |         |
|                                                         | HR (95% CI)                   | 1                      | 1.07 (0.87-1.30) | 1.11 (0.90-1.38) | 1.24 (0.96-1.61) | 0.09    |
| Conjugated linoleic acid (18:2 CLAs)                    | Incident cases / Participants | 205 / 26,365           | 260 / 26,366     | 259 / 26,368     | 245 / 26,364     |         |
|                                                         | HR (95% CI)                   | 1                      | 1.08 (0.89-1.31) | 1.12 (0.91-1.39) | 1.10 (0.84-1.44) | 0.5     |
| Trans vaccenic acid (18:1-11 t or 18:1t n-7)            | Incident cases / Participants | 174 / 26,367           | 257 / 26,363     | 276 / 26,368     | 262 / 26,365     |         |
|                                                         | HR (95% CI)                   | 1                      | 1.15 (0.94-1.42) | 1.18 (0.96-1.46) | 1.19 (0.96-1.48) | 0.2     |
| Trans-palmitoleic acid (16:1 t)                         | Incident cases / Participants | 195 / 26,364           | 232 / 26,367     | 267 / 26,367     | 275 / 26,365     |         |
|                                                         | HR (95% CI)                   | 1                      | 1.00 (0.82-1.22) | 1.04 (0.86-1.27) | 1.20 (0.99-1.46) | 0.03    |

HR: Cause-specific hazard ratios, CI: Confidence Interval. Multivariable Cox proportional hazard model were adjusted for (=main model) age (time scale), sex, body mass index (continuous, kg/m<sup>2</sup>), physical activity (categorical IPAQ variable: high, moderate, low), smoking status (categorical: never, former, current smokers), educational level (categorical: less than high school degree, less than two years after high school degree, two and more years after high school degree), number of 24-hour dietary records (continuous), family history of type 2 diabetes (categorical: yes, no), prevalence of cardiovascular disease (categorical: yes, no), prevalence of dislipidemia (categorical: yes, no), marital status (categorical: married, in a relationship, divorced, widowed, single), baseline intakes of energy without alcohol (continuous, kcal/d), alcohol (continuous, g/d), sodium (continuous, g/d), saturated fatty acids (continuous, g/d), sugar (continuous, g/d), whole-grain foods (continuous, g/d), red and processed meat (continuous, g/d), fruits and vegetables (continuous, g/d).

**Supplemental Table 5:** Association between trans fatty acid intake and type 2 diabetes further adjusting for fiber instead of whole-grain intake, NutriNet-Santé cohort, France, 2009-2021 (n=105,551)

|                                                         |                               | Sex-specific quartiles |                  |                  |                  | P-trend |
|---------------------------------------------------------|-------------------------------|------------------------|------------------|------------------|------------------|---------|
|                                                         |                               | 1                      | 2                | 3                | 4                |         |
| <b>Total trans fatty acids</b>                          | Incident cases / Participants | 199 / 26,359           | 221 / 26,403     | 242 / 26,402     | 307 / 26,387     |         |
|                                                         | HR (95% CI)                   | 1                      | 0.95 (0.78-1.17) | 1.14 (0.92-1.41) | 1.38 (1.10-1.73) | <0.001  |
| <b>Trans fatty acids from industry-produced sources</b> | Incident cases / Participants | 199 / 26,364           | 218 / 26,401     | 245 / 26,399     | 307 / 26,387     |         |
|                                                         | HR (95% CI)                   | 1                      | 0.97 (0.79-1.19) | 1.20 (0.96-1.48) | 1.44 (1.15-1.82) | <0.001  |
| Elaidic acid (18:1 t)                                   | Incident cases / Participants | 202 / 26,367           | 219 / 26,397     | 242 / 26,399     | 306 / 26,388     |         |
|                                                         | HR (95% CI)                   | 1                      | 0.96 (0.78-1.17) | 1.14 (0.93-1.41) | 1.36 (1.09-1.71) | 0.001   |
| Linolelaidic acid (18:2 t,t)                            | Incident cases / Participants | 157 / 26,344           | 221 / 26,404     | 295 / 26,417     | 296 / 26,386     |         |
|                                                         | HR (95% CI)                   | 1                      | 1.18 (0.95-1.46) | 1.37 (1.11-1.68) | 1.28 (1.04-1.58) | 0.08    |
| Transdocosenoic acid (22:1 t)                           | Incident cases / Participants | 185 / 28,654           | 254 / 25,596     | 237 / 25,687     | 293 / 25,614     |         |
|                                                         | HR (95% CI)                   | 1                      | 1.08 (0.88-1.33) | 0.97 (0.79-1.19) | 1.00 (0.82-1.22) | 0.7     |
| Isomer 18:2 t not further defined                       | Incident cases / Participants | 179 / 26,362           | 230 / 26,397     | 274 / 26,416     | 286 / 26,376     |         |
|                                                         | HR (95% CI)                   | 1                      | 1.07 (0.87-1.31) | 1.28 (1.05-1.57) | 1.31 (1.06-1.62) | 0.007   |
| <b>Trans fatty acids from ruminant sources</b>          | Incident cases / Participants | 195 / 26,364           | 256 / 26,394     | 256 / 26,409     | 262 / 26,384     |         |
|                                                         | HR (95% CI)                   | 1                      | 1.06 (0.87-1.29) | 1.11 (0.90-1.37) | 1.24 (0.96-1.61) | 0.09    |
| Conjugated linoleic acid (18:2 CLAs)                    | Incident cases / Participants | 205 / 26,363           | 260 / 26,399     | 260 / 26,410     | 244 / 26,379     |         |
|                                                         | HR (95% CI)                   | 1                      | 1.08 (0.89-1.31) | 1.12 (0.90-1.39) | 1.09 (0.83-1.42) | 0.6     |
| Trans vaccenic acid (18:1-11 t or 18:1t n-7)            | Incident cases / Participants | 174 / 26,321           | 256 / 26,416     | 278 / 26,432     | 261 / 26,382     |         |
|                                                         | HR (95% CI)                   | 1                      | 1.15 (0.93-1.41) | 1.18 (0.96-1.46) | 1.19 (0.96-1.47) | 0.2     |
| Trans-palmitoleic acid (16:1 t)                         | Incident cases / Participants | 195 / 26,374           | 232 / 26,393     | 267 / 26,408     | 275 / 26,376     |         |
|                                                         | HR (95% CI)                   | 1                      | 0.99 (0.82-1.21) | 1.04 (0.85-1.26) | 1.19 (0.98-1.45) | 0.04    |

HR: Cause-specific hazard ratios, CI: Confidence Interval. Multivariable Cox proportional hazard model were adjusted for (=main model) age (time scale), sex, body mass index (continuous, kg/m<sup>2</sup>), physical activity (categorical IPAQ variable: high, moderate, low), smoking status (categorical: never, former, current smokers), educational level (categorical: less than high school degree, less than two years after high school degree, two and more years after high school degree), number of 24-hour dietary records (continuous), family history of type 2 diabetes (categorical: yes, no), prevalent of cardiovascular disease (categorical: yes, no), prevalent of dislipidemia (categorical: yes, no), marital status (categorical: married, in a relationship, divorced, widowed, single), baseline intakes of energy without alcohol (continuous, kcal/d), alcohol (continuous, g/d), sodium (continuous, g/d), saturated fatty acids (continuous, g/d), sugar (continuous, g/d), whole-grain foods (continuous, g/d), red and processed meat (continuous, g/d), fruits and vegetables (continuous, g/d).

**Supplemental Table 6:** Association between trans fatty acid intake and type 2 diabetes further adjusting for the proportion of ultra-processed food (in weight, percentage of grams per day) in the total diet, NutriNet-Santé cohort, France, 2009-2021 (n=105,551)

|                                                         |                               | Sex-specific quartiles |                   |                   |                   | P-trend |
|---------------------------------------------------------|-------------------------------|------------------------|-------------------|-------------------|-------------------|---------|
|                                                         |                               | 1                      | 2                 | 3                 | 4                 |         |
| <b>Total trans fatty acids</b>                          | Incident cases / Participants | 199 / 26,359           | 221 / 26,403      | 242 / 26,402      | 307 / 26,387      |         |
|                                                         | HR (95% CI)                   | 1                      | 0.97 (0.79- 1.19) | 1.16 (0.93- 1.43) | 1.39 (1.11- 1.75) | <0.001  |
| <b>Trans fatty acids from industry-produced sources</b> | Incident cases / Participants | 199 / 26,364           | 218 / 26,401      | 245 / 26,399      | 307 / 26,387      |         |
|                                                         | HR (95% CI)                   | 1                      | 0.99 (0.81- 1.21) | 1.23 (0.99- 1.52) | 1.48 (1.18- 1.87) | <0.001  |
| Elaidic acid (18:1 t)                                   | Incident cases / Participants | 202 / 26,367           | 219 / 26,397      | 242 / 26,399      | 306 / 26,388      |         |
|                                                         | HR (95% CI)                   | 1                      | 0.98 (0.80- 1.20) | 1.17 (0.95- 1.45) | 1.40 (1.12- 1.76) | <0.001  |
| Octadecadienoic acid (18:2 t,t)                         | Incident cases / Participants | 157 / 26,344           | 221 / 26,404      | 295 / 26,417      | 296 / 26,386      |         |
|                                                         | HR (95% CI)                   | 1                      | 1.18 (0.95- 1.46) | 1.37 (1.11- 1.69) | 1.29 (1.05- 1.59) | 0.06    |
| Transdocosenoic acid (22:1 t)                           | Incident cases / Participants | 185 / 28,654           | 254 / 25,596      | 237 / 25,687      | 293 / 25,614      |         |
|                                                         | HR (95% CI)                   | 1                      | 1.08 (0.88- 1.33) | 0.97 (0.79- 1.20) | 1.01 (0.82- 1.23) | 0.8     |
| Isomer 18:2 t not further defined                       | Incident cases / Participants | 179 / 26,362           | 230 / 26,397      | 274 / 26,416      | 286 / 26,376      |         |
|                                                         | HR (95% CI)                   | 1                      | 1.06 (0.86- 1.30) | 1.26 (1.03- 1.54) | 1.26 (1.01- 1.56) | 0.02    |
| <b>Trans fatty acids from ruminant sources</b>          | Incident cases / Participants | 195 / 26,364           | 256 / 26,394      | 256 / 26,409      | 262 / 26,384      |         |
|                                                         | HR (95% CI)                   | 1                      | 1.06 (0.87- 1.29) | 1.10 (0.89- 1.36) | 1.21 (0.94- 1.57) | 0.1     |
| Conjugated linoleic acid (18:2 CLAs)                    | Incident cases / Participants | 205 / 26,363           | 260 / 26,399      | 260 / 26,410      | 244 / 26,379      |         |
|                                                         | HR (95% CI)                   | 1                      | 1.08 (0.89- 1.32) | 1.12 (0.90- 1.39) | 1.08 (0.83- 1.42) | 0.6     |
| Trans vaccenic acid (18:1-11 t or 18:1t n-7)            | Incident cases / Participants | 174 / 26,321           | 256 / 26,416      | 278 / 26,432      | 261 / 26,382      |         |
|                                                         | HR (95% CI)                   | 1                      | 1.12 (0.91- 1.37) | 1.13 (0.92- 1.39) | 1.11 (0.90- 1.38) | 0.5     |
| Trans-palmitoleic acid (16:1 t)                         | Incident cases / Participants | 195 / 26,374           | 232 / 26,393      | 267 / 26,408      | 275 / 26,376      |         |
|                                                         | HR (95% CI)                   | 1                      | 1.00 (0.82- 1.22) | 1.05 (0.86- 1.27) | 1.19 (0.98- 1.45) | 0.04    |

HR: Cause-specific hazard ratios, CI: Confidence Interval. Multivariable Cox proportional hazard model were adjusted for (=main model) age (time scale), sex, body mass index (continuous, kg/m<sup>2</sup>), physical activity (categorical IPAQ variable: high, moderate, low), smoking status (categorical: never, former, current smokers), educational level (categorical: less than high school degree, less than two years after high school degree, two and more years after high school degree), number of 24-hour dietary records (continuous), family history of type 2 diabetes (categorical: yes, no), prevalent of cardiovascular disease (categorical: yes, no), prevalent of dislipidemia (categorical: yes, no), marital status (categorical: married, in a relationship, divorced, widowed, single), baseline intakes of energy without alcohol (continuous, kcal/d), alcohol (continuous, g/d), sodium (continuous, g/d), saturated fatty acids (continuous, g/d), sugar (continuous, g/d), whole-grain foods (continuous, g/d), red and processed meat (continuous, g/d), fruits and vegetables (continuous, g/d).



**Supplemental Table 7:** Association between trans fatty acid intake and type 2 diabetes in ex and non-smokers, NutriNet-Santé cohort, France, 2009-2021 (n=105,551)

|                                                         |                               | Sex-specific quartiles |                  |                  |                  | P-trend |
|---------------------------------------------------------|-------------------------------|------------------------|------------------|------------------|------------------|---------|
|                                                         |                               | 1                      | 2                | 3                | 4                |         |
| <b>Total trans fatty acids</b>                          | Incident cases / Participants | 190 / 22,556           | 204 / 22,602     | 227 / 22,595     | 277 / 22,583     |         |
|                                                         | HR (95% CI)                   | 1                      | 0.96 (0.78-1.18) | 1.17 (0.94-1.45) | 1.37 (1.09-1.73) | 0.001   |
| <b>Trans fatty acids from industry-produced sources</b> | Incident cases / Participants | 185 / 22,562           | 210 / 22,598     | 225 / 22,592     | 278 / 22,584     |         |
|                                                         | HR (95% CI)                   | 1                      | 1.03 (0.83-1.27) | 1.24 (0.99-1.54) | 1.47 (1.16-1.87) | <0.001  |
| Elaidic acid (18:1 t)                                   | Incident cases / Participants | 193 / 22,561           | 203 / 22,597     | 223 / 22,590     | 279 / 22,588     |         |
|                                                         | HR (95% CI)                   | 1                      | 0.95 (0.77-1.17) | 1.14 (0.92-1.42) | 1.35 (1.07-1.70) | 0.002   |
| Octadecadienoic acid (18:2 t,t)                         | Incident cases / Participants | 144 / 22,565           | 213 / 22,591     | 277 / 22,604     | 264 / 22,576     |         |
|                                                         | HR (95% CI)                   | 1                      | 1.28 (1.03-1.61) | 1.46 (1.17-1.81) | 1.33 (1.07-1.65) | 0.1     |
| Transdocosenoic acid (22:1 t)                           | Incident cases / Participants | 162 / 23,421           | 241 / 22,297     | 224 / 22,311     | 271 / 22,307     |         |
|                                                         | HR (95% CI)                   | 1                      | 1.13 (0.91-1.40) | 1.03 (0.82-1.28) | 1.04 (0.84-1.29) | 0.8     |
| Isomer 18:2 t not further defined                       | Incident cases / Participants | 169 / 22,568           | 219 / 22,591     | 248 / 22,602     | 262 / 22,575     |         |
|                                                         | HR (95% CI)                   | 1                      | 1.12 (0.91-1.38) | 1.28 (1.04-1.58) | 1.31 (1.05-1.64) | 0.01    |
| <b>Trans fatty acids from ruminant sources</b>          | Incident cases / Participants | 187 / 22,562           | 240 / 22,593     | 233 / 22,599     | 238 / 22,582     |         |
|                                                         | HR (95% CI)                   | 1                      | 1.15 (0.94-1.41) | 1.13 (0.91-1.42) | 1.29 (0.99-1.69) | 0.09    |
| Conjugated linoleic acid (18:2 CLAs)                    | Incident cases / Participants | 190 / 22,559           | 247 / 22,599     | 238 / 22,595     | 223 / 22,583     |         |
|                                                         | HR (95% CI)                   | 1                      | 1.12 (0.92-1.37) | 1.14 (0.91-1.42) | 1.12 (0.84-1.48) | 0.5     |
| Trans vaccenic acid (18:1-11 t or 18:1t n-7)            | Incident cases / Participants | 171 / 22,520           | 232 / 22,664     | 256 / 22,578     | 239 / 22,574     |         |
|                                                         | HR (95% CI)                   | 1                      | 1.07 (0.87-1.33) | 1.16 (0.94-1.43) | 1.13 (0.90-1.41) | 0.3     |
| Trans-palmitoleic acid (16:1 t)                         | Incident cases / Participants | 186 / 22,572           | 220 / 22,590     | 241 / 22,597     | 251 / 22,577     |         |
|                                                         | HR (95% CI)                   | 1                      | 1.03 (0.84-1.26) | 1.04 (0.85-1.28) | 1.21 (0.98-1.48) | 0.05    |

HR: Cause-specific hazard ratios, CI: Confidence Interval. Multivariable Cox proportional hazard model were adjusted for (=main model) age (time scale), sex, body mass index (continuous, kg/m<sup>2</sup>), physical activity (categorical IPAQ variable: high, moderate, low), smoking status (categorical: never, former, current smokers), educational level (categorical: less than high school degree, less than two years after high school degree, two and more years after high school degree), number of 24-hour dietary records (continuous), family history of type 2 diabetes (categorical: yes, no), prevalent of cardiovascular disease (categorical: yes, no), prevalent of dislipidemia (categorical: yes, no), marital status (categorical: married, in a relationship, divorced, widowed, single), baseline intakes of energy without alcohol (continuous, kcal/d), alcohol (continuous, g/d), sodium (continuous, g/d), saturated fatty acids (continuous, g/d), sugar (continuous, g/d), whole-grain foods (continuous, g/d), red and processed meat (continuous, g/d), fruits and vegetables (continuous, g/d).

**Supplemental Table 8:** Association between trans fatty acid intake and type 2 diabetes adjusted for clinical factors, NutriNet-Santé cohort, France, 2009-2021 (n=105,551)

|                                                         |                               | Sex-specific quartiles |                  |                  |                  |         |
|---------------------------------------------------------|-------------------------------|------------------------|------------------|------------------|------------------|---------|
|                                                         |                               | 1                      | 2                | 3                | 4                | P-trend |
| <b>Total trans fatty acids</b>                          | Incident cases / Participants | 199 / 26,359           | 221 / 26,403     | 242 / 26,402     | 307 / 26,387     |         |
|                                                         | HR (95% CI)                   | 1                      | 0.93 (0.76-1.13) | 1.09 (0.90-1.34) | 1.29 (1.06-1.59) | 0.002   |
| <b>Trans fatty acids from industry-produced sources</b> | Incident cases / Participants | 199 / 26,364           | 218 / 26,401     | 245 / 26,399     | 307 / 26,387     |         |
|                                                         | HR (95% CI)                   | 1                      | 0.97 (0.79-1.18) | 1.20 (0.97-1.48) | 1.43 (1.14-1.80) | <0.001  |
| Elaidic acid (18:1 t)                                   | Incident cases / Participants | 202 / 26,367           | 219 / 26,397     | 242 / 26,399     | 306 / 26,388     |         |
|                                                         | HR (95% CI)                   | 1                      | 0.93 (0.76-1.13) | 1.11 (0.90-1.36) | 1.28 (1.03-1.59) | 0.005   |
| Linolelaidic acid (18:2 t,t)                            | Incident cases / Participants | 157 / 26,344           | 221 / 26,404     | 295 / 26,417     | 296 / 26,386     |         |
|                                                         | HR (95% CI)                   | 1                      | 1.21 (0.97-1.50) | 1.44 (1.17-1.77) | 1.43 (1.16-1.76) | 0.003   |
| Isomer 18:2 t not further defined                       | Incident cases / Participants | 179 / 26,362           | 230 / 26,397     | 274 / 26,416     | 286 / 26,376     |         |
|                                                         | HR (95% CI)                   | 1                      | 1.10 (0.90-1.35) | 1.36 (1.11-1.66) | 1.41 (1.14-1.74) | <0.001  |
| Transdocosenoic acid (22:1 t)                           | Incident cases / Participants | 185 / 28,654           | 254 / 25,596     | 237 / 25,687     | 293 / 25,614     |         |
|                                                         | HR (95% CI)                   | 1                      | 1.10 (0.89-1.35) | 0.96 (0.78-1.19) | 0.99 (0.81-1.21) | 0.6     |
| <b>Trans fatty acids from ruminant sources</b>          | Incident cases / Participants | 195 / 26,364           | 256 / 26,394     | 256 / 26,409     | 262 / 26,384     |         |
|                                                         | HR (95% CI)                   | 1                      | 1.04 (0.86-1.26) | 1.09 (0.89-1.33) | 1.18 (0.94-1.48) | 0.1     |
| Conjugated linoleic acid (18:2 CLAs)                    | Incident cases / Participants | 205 / 26,363           | 260 / 26,399     | 260 / 26,410     | 244 / 26,379     |         |
|                                                         | HR (95% CI)                   | 1                      | 1.06 (0.88-1.29) | 1.13 (0.92-1.37) | 1.07 (0.85-1.35) | 0.5     |
| Trans vaccenic acid (18:1-11 t or 18:1t n-7)            | Incident cases / Participants | 174 / 26,321           | 256 / 26,416     | 278 / 26,432     | 261 / 26,382     |         |
|                                                         | HR (95% CI)                   | 1                      | 1.10 (0.89-1.35) | 1.13 (0.92-1.38) | 1.09 (0.88-1.35) | 0.6     |
| Trans-palmitoleic acid (16:1 t)                         | Incident cases / Participants | 195 / 26,374           | 232 / 26,393     | 267 / 26,408     | 275 / 26,376     |         |
|                                                         | HR (95% CI)                   | 1                      | 1.01 (0.83-1.23) | 1.04 (0.85-1.26) | 1.23 (1.01-1.49) | 0.02    |

HR: Cause-specific hazard ratios, CI: Confidence Interval. Multivariable Cox proportional hazard model were adjusted for (=main model) age (time scale), sex, body mass index (continuous, kg/m<sup>2</sup>), physical activity (categorical IPAQ variable: high, moderate, low), smoking status (categorical: never, former, current smokers), educational level (categorical: less than high school degree, less than two years after high school degree, two and more years after high school degree), number of 24-hour dietary records (continuous), family history of type 2 diabetes (categorical: yes, no), prevalent of cardiovascular disease (categorical: yes, no), prevalent of dislipidemia (categorical: yes, no) and marital status (categorical: married, in a relationship, divorced, widowed, single).

## References

1. Desquilbet L, Mariotti F. Dose-response analyses using restricted cubic spline functions in public health research. *Stat Med*. 2010;29(9):1037-1057. doi:10.1002/sim.3841
2. Sterne JAC, White IR, Carlin JB, et al. Multiple imputation for missing data in epidemiological and clinical research: potential and pitfalls. *BMJ*. 2009;338:b2393.
